# Supplementary material
Source: PubMed Central journal article supplement (PMC4382081)
Supplement: NIHMS675092-supplement-Supplement.pdf [file NIHMS675092-supplement-Supplement.pdf]

## Supplementary Materials

### **Vaccine-Elicited CD4 T Cells Induce Immunopathology Following Chronic LCMV Infection**

Pablo Penaloza-MacMaster<sup>1</sup>, Daniel L. Barber<sup>2</sup>, E. John Wherry<sup>3</sup>, Nicholas M. Provine<sup>1</sup>, Jeffrey E. Teigler<sup>1</sup>, Lily Parenteau<sup>1</sup>, Stephen Blackmore<sup>1</sup>, Erica N. Borducchi<sup>1</sup>, Rafael A. Larocca<sup>1</sup>, Kathleen B. Yates<sup>4</sup>, Hao Shen<sup>3</sup>, W. Nicholas Haining<sup>4</sup>, Rami Sommerstein<sup>5</sup>, Daniel D. Pinschewer<sup>5,6</sup>, Rafi Ahmed<sup>7</sup>, Dan. H. Barouch<sup>1,8,\*</sup>

<sup>1</sup>Center for Virology and Vaccine Research, Beth Israel Deaconess Medical Center, Boston, MA 02215, USA. <sup>2</sup>Laboratory of Parasitic Diseases, National Institute of Allergy and Infectious Diseases, National Institutes of Health, Bethesda MD 20892, USA. <sup>3</sup>Department of Microbiology and Institute for Immunology, Perelman School of Medicine, University of Pennsylvania, Philadelphia, PA 19104, USA. <sup>4</sup>Department of Pediatric Oncology, Dana-Farber Cancer Institute, Harvard Medical School, Boston, MA 02115. <sup>5</sup>Department of Pathology and Immunology & W.H.O. Collaborating Centre for Vaccine Immunology, University of Geneva, 1211 Geneva, Switzerland. <sup>6</sup>Department of Biomedicine – Haus Petersplatz, Division of Experimental Virology, University of Basel, 4009 Basel, Switzerland. <sup>7</sup>Emory Vaccine Center and Department of Microbiology and Immunology, Emory University School of Medicine, Atlanta, GA 30322, USA. <sup>8</sup>Ragon Institute of MGH, MIT, and Harvard, Boston, MA 02114.

**This PDF file includes:**

Materials and Methods  
Supplementary Text

Figures S1 to S13  
Tables S1 to S3

## **Materials and Methods**

### Mice and Infections:

6-8 week old C57BL/6 mice (Jackson) were immunized with  $3 \times 10^4$  CFU and boosted homologously at day 60 with  $10^6$  CFU of a *Listeria monocytogenes* vaccine expressing a single CD4 T cell epitope derived from LCMV GP61-80 (LMgp61)(14). Immunizations were performed intravenously (i.v.). After 30 days, LMgp61 immune mice were challenged i.v. with  $2 \times 10^6$  PFU of LCMV Cl-13 (resulting in a persistent infection), as described previously or intraperitoneally (i.p.) with  $2 \times 10^5$  PFU of LCMV Armstrong (resulting in an acutely controlled infection)(30). To assess the role of virus-specific antibody responses at preventing immune dysregulation by memory CD4 T cells, we challenged mice with a genetically engineered LCMV Cl-13 (rCl-13/WE-GP) expressing the GP of the WE strain instead of its own GP and administered 500  $\mu$ g of anti-WE GP antibody i.p. (clone KL25) on days -1 and 0 of infection. rCl-13/WE-GP and an analogous virus lacking amino acids 61-68 of WE-GP (rCl-13WE-GP $\Delta$ gp61), a deletion known to be viable(31), were generated by reverse genetic techniques as previously described(32).

Peptide-pulsed dendritic cell (DC) vaccinations were performed as previously described(33). In brief, bone marrow derived DCs were in vitro expanded for 5 days with GM-CSF, and were then matured for 1 day with LPS, and coated with the

indicated MHC-II restricted peptides for 2 hr. Cells were extensively washed prior to injection. C57BL/6 mice received  $4 \times 10^5$  peptide-coated DCs and after one week, they received  $20 \times 10^7$  peptide coated spleen cells. After 50 days, mice were boosted with  $1.4 \times 10^6$  peptide coated DCs, and challenged with LCMV Cl-13 at day 40 post-boost. For BALB/c experiments, a single DC prime was performed, and mice were challenged with LCMV Cl-13 after three weeks following immunization. All DC vaccinations were done i.v. The complete sequences of all the various CD4 epitopes that were used are as follows: GP61 (GP61-80) GLNGPDIYKGVYQFKSVEFD; GP6 (GP6-20) TMFEALPHIIDEVIN; GP126 (GP126-140) TSAFNKKTFDHTLMS; NP309 (NP309-328): SGEGWPYIACRTSIVGRAWE; NP116 (NP116-130) SERPQASGVYMGNLT.

For experiments where viral control was assessed,  $2 \times 10^6$  PFU of LCMV (either Cl-13 or Armstrong) were given i.v. Titration of LCMV was performed on Vero cell monolayers as described previously(34). LCMV-specific IgG responses were detected by standard ELISA using lysates of BHK-21 cells infected with LCMV Cl-13. H-2K<sup>b</sup> deficient mice (Taconic) were utilized to avoid the generation of memory H-2K<sup>b</sup> restricted GP70-specific CD8 T cell responses. All mouse experiments were performed with approval by the BIDMC Institutional Animal Care and Use Committee (IACUC).

Histology:

---

Following euthanasia, mouse carcasses were placed in Bouin's fixative (Polysciences, Inc), and whole mouse necropsy and H&E stains were performed at the Dana Farber Mouse Histopathology Core (220 Longwood Ave, Boston MA 02115).

#### Cell depletions and cell transfers:

CD4 T cell depletions were performed by i.p. injection of 500  $\mu$ g of GK1.5 antibody (BioXcell) given for two consecutive days before Cl-13 challenge. CD8 T cell depletions were performed by i.p. injection of 500  $\mu$ g of 2.43 antibody (BioXcell) given 4 weeks before to Cl-13 challenge to remove LCMV-specific CD8 T cell responses generated by LMgp33 or VVgp33 immunization. Rat IgG2b (BioXcell) was used as negative control. For adoptive transfers,  $10^6$  P14 cells or LCMV Armstrong-immune CD8 T cells (day 45 post-infection) were injected i.v. one day before LCMV Cl-13 challenge.

#### Reagents and flow cytometry:

Single cell suspensions were obtained from blood and tissues as previously described (35). Intracellular cytokine staining was performed after surface staining followed by fixation and permeabilization (cytofix/cytoperm, Perm Wash; BD Biosciences). Intracellular staining of Foxp3 was performed according to manufacturer's instructions (eBioscience). Dead cells were excluded by gating out cells positive for Live/Dead fixable dead cell stain (Invitrogen). LCMV MHC class I and class II tetramers were obtained from the NIH tetramer facility (Emory

University). I-Ab GP66 tetramer was used to detect LCMV-specific CD4 T cells. Samples were acquired with a Becton Dickinson LSRII and analyzed using FlowJo (Treestar).

#### Microarray Data Acquisition and Analysis:

Gene expression profiling was performed as previously described(36, 37) and data were uploaded (GSE number GSE63825). Briefly, LCMV-specific CD4<sup>+</sup> T cells were sorted to  $\geq 98\%$  purity on a FACS Aria (BD Biosciences) using I-Ab GP66 tetramers (which recognize the core GP61-80 CD4 epitope sequence) as previously shown(27). Sorted cells were stored at  $-80^{\circ}\text{C}$  in 1ml of TRIzol (Life Sciences). RNA extraction was performed using the RNAdvance Tissue Isolation kit (Agencourt) as per manufacturer's instructions. The cDNA synthesis was performed using the Ovation Pico WTA v2 kit (NuGEN) following manufacturer's instructions. Proper amplification of cDNA was confirmed using an Agilent 2100 Bioanalyzer (Agilent Technologies) and performed by the Harvard Biopolymers Facility. cDNA was subsequently fragmented and biotinylated using an Encore Biotin Module 4200 (NuGEN). cDNA was hybridized to Mouse Genome 430 v2.0 chip (Affymetrix) by the Microarray Core of Dana Farber Cancer Institute. RMA method was used to process data image files. Differential gene expression was determined using GENE-E v3.0.163 (Broad Institute). Probes were collapsed to genes and  $\log_2$  corrected. Gene set enrichment analysis and leading edge analysis were performed using GSEA v2.0.12 (Broad Institute). The following gene set collections were used: C2 v4.0, C5 v4.0, and C7 v4.0 (<http://www.broadinstitute.org/gsea/msigdb/index.jsp>). CD4 T

cell signatures were from published data sets: CD4 T cell exhaustion and memory(27), Th1, Th2, Th17, iTreg, and naïve(38), Tfh(39), and anergic T cells(40). Permutation was performed on gene set. Gene ontology terms were determined using GOrilla <http://cbl-gorilla.cs.technion.ac.il>(41, 42). Genes within each cluster were compared against the complete list of genes in the dataset.

Statistical analysis:

Statistical analyses for survival plots were done using the Mantel-Cox test. All other analyses were performed using the Mann Whitney test. Data were analyzed using Prism (Graphpad).

---

**Fig. S1. GP61-specific CD4 T cell responses following LM-GP61 immunization.**

A) Representative FACS plots showing GP61-80-specific CD4 T cell responses in blood following immunization with LM-GP61. B) Summary of GP61-specific CD4 T cell responses in blood following immunization with LM-GP61. Data are from 2 experiments, n=4 mice/group per experiment. Error bars indicate SEM.

**Fig. S2. Vaccine-induced CD4 T cell immunopathology also occurs with different immunization regimens, different epitopes, and different mouse strains.**

A) Experimental outline for assessing the role of other memory CD4 T cell responses in C57BL/6 mice. B) Percent survival in C57BL/6 mice vaccinated with other CD4 T cell epitopes. C) Experimental outline for assessing the role of other memory CD4 T cell responses in BALB/c mice. D) Percent survival in BALB/c mice vaccinated with a nucleoprotein-specific CD4 T cell epitope. Statistical analyses for survival plots were performed using the Mantel-Cox test. Panels B and D are from 2 experiments, N=4-5 mice/group per experiment.

**Fig. S3. Overall gating scheme for enumeration for virus-specific immune responses.**

A) Gating scheme for I-A<sup>b</sup>GP66<sup>+</sup> CD4 T cells. In order to reduce staining background, CD8 T cells (CD8<sup>+</sup>), B cells (B220<sup>+</sup>) and macrophages (F4/80<sup>+</sup>) were excluded. A side-by-side comparison was performed using I-A<sup>b</sup>CLIP as negative control stain. B) Gating scheme for germinal center B cells. C) Gating scheme for H-2D<sup>b</sup>GP276<sup>+</sup> and H-2D<sup>b</sup>GP33<sup>+</sup> CD8 T cell responses.

**Fig. S4. Similar pattern of viral tropism following LM-GP61 vaccination and chronic viral challenge.** A) Viral loads in tissues. B) Representative FACS plots showing viral antigen in different cell subsets. C) Summary of viral antigen expression in different cell subsets. \*, P=0.05; \*\*, P= 0.03; \*\*\*, P=0.01 (Mann-Whitney test). Data are from spleen on day 8.5, and from 2 experiments, n=4 mice/group per experiment. Error bars indicate SEM.

**Fig. S5. Overall CD4 T cell and Treg collapse in LMgp61 vaccinated mice following LCMV Cl-13 challenge.** A) Representative FACS plot of systemic CD4 and Treg responses. B) Numbers of CD4 T cells C) Numbers of Tregs. D) Effector (gp61-specific) to Treg ratio. E) Numbers of lymphocytes per mL of blood. Data are from PBMCs on day 8.5, and from 3 experiments, n=3-4 mice/group per experiment. \*, P=0.05; \*\*, P=0.03; \*\*\*, P=0.003 (Mann-Whitney test). Error bars indicate SEM.

**Fig. S6. Increase in the precursor frequency of virus-specific CD4 T cells impairs antiviral immunity following LCMV Cl-13 challenge.** A) Experimental outline. B) Percent survival. C) Longitudinal analysis of LCMV-specific IgG responses in sera. D) Longitudinal analysis of viral control in sera. Statistical analyses for survival plots were performed using the Mantel-Cox test. All other analyses were performed using the Mann-Whitney test. Data are from 2 experiments, N=5-7 mice/group per experiment. \*, P=0.05; \*\*, P=0.02; \*\*\*, P=0.007. Error bars indicate SEM.



**Fig. S7. The subdominant GP70-77 CD8 T cell epitope is embedded in the GP61-80 CD4 T cell epitope.** There is a H-2K<sup>b</sup>-restricted subdominant CD8 T cell epitope nested within the GP61-80 CD4 T cell epitope. A) Amino acid sequence of the H-2K<sup>b</sup>-restricted GP70-77 epitope. B) LM-GP61 vaccination primes the H-2K<sup>b</sup>GP70-77 specific CD8 T cell response. H-2K<sup>b</sup>GP70-77 specific CD8 T cells were measured at day 30 of LM-wt or LM-GP61 immunization. Data were corroborated in 3 experiments. N=4 mice/group per experiment.

**Fig. S8. Immunopathogenesis of the LM-GP61 vaccine in H-2K<sup>b</sup> deficient mice following LCMV Cl-13 challenge.** At day 30 post-vaccination, mice were challenged with LCMV Cl-13. A) Weight loss. B) Percent survival. Data are from 2 experiments, n=4-5 mice/group.

**Fig. S9. Phenotypic characterization of CD4 T cell dysregulation.** A) Representative FACS plot showing that splenic I-Ab GP66+ CD4 T cells do not differentiate into FoxP3+ Tregs (gated from total CD4 T cells). B) Representative FACS plots showing similar Tfh conversion between LM-wt and LM-GP61 vaccinated mice. C) Decreased Eomes expression by dysregulated CD4 T cells. D) Increased CCR5 expression by dysregulated CD4 T cells. Data from panels B, C and D are gated from I-Ab GP66+ CD4 T cells (gating scheme on Fig. S3A). All data are from day 9 following LCMV Cl-13 challenge. Data are from 2 experiments, n=4 mice/group per experiment. \*, P=0.02; \*\*, P=0.0002 (Mann-Whitney test). Error bars indicate SEM.

**Fig. S10. Functional characterization of CD4 T cell dysregulation.** A) Representative FACS plot showing similar T helper differentiation patterns between LM-wt and LM-GP61 vaccinated groups. Note the typical Th1 differentiation (IFN $\gamma$ , TNF $\alpha$ , IL-2) with partial Tfh differentiation (IL-21). Splenocytes were stimulated for 5 hr at 37°C with GP61 peptide, and stained with the indicated antibodies. IL-21 staining was performed with IL-21R-Fc. All data are from day 9 following LCMV Cl-13 challenge. Data are representative of 2 experiments, n=4 mice/group per experiment.

**Fig. S11. Hierarchical clustering of leading edge analysis for all gene sets enriched in LMgp61 with a p value <0.01.** Enriched gene sets are rows and enriched genes are columns. Yellow boxes denote when a specific gene is enriched in a specific gene set. Gene ontology terms were determined using GOrilla (<http://cbl-gorilla.cs.technion.ac.il/>). Data are based on cDNA microarray analysis of Figure 4.

**Fig. S12. GP61-specific CD4 T cells provide help to adaptive immune responses following an acutely controlled LCMV Armstrong challenge.** A) Experimental outline. B) Representative FACS plot showing splenic I-Ab GP66+ CD4 T cells following acute LCMV Armstrong challenge (day 8). C) Numbers of I-Ab GP66-specific CD4 T cells in spleen following acute LCMV Armstrong challenge (day 8). D) Magnitudes of LCMV-specific (DbGP276+) CD8 T cells. E) Percent expression of CD62L on LCMV-specific CD8 T cells. F) Expression of CD127. G) Expression of bcl-2.

H) Expression of Eomes. I) Expression of t-bet. J) Viral loads at day 5. Data from panels D-I are from DbGP276-specific CD8 T cells at day ~90 following LCMV Armstrong immunization. Gating scheme is shown on Fig. S3C. Acute infections were performed with LCMV Armstrong. Data are from 3 experiments, n=3-4 mice/group per experiment. \*, P=0.05; \*\*, P=0.02 (Mann-Whitney test). Error bars indicate SEM.

**Fig. S13. Mechanism of immune dysregulation by CD4 T cell vaccines following chronic viral challenge.** Preferential induction of CD4 T cell responses by CD4 T cell vaccines results in dysregulated expansion of memory CD4 T cells following chronic LCMV infection. Immune dysregulation is driven by persistent antigen, which results in uncontrolled expansion of memory CD4 T cells that override immune exhaustion and induce cytokine storm. Memory CD4 T cell dysregulation can be prevented by pre-existing CD8 T cell and antibody responses, which are able to control the infection. Most immune responses following infection of vaccination induce relatively greater CD8 T cell responses relative to CD4 T cell responses. This may represent an evolutionarily conserved mechanism, and altering this natural bias with CD4 T cell vaccines may result in a lethal outcome.

**Table S1. Top genes enriched in CD4 T cells from LM-wt vaccination followed by LCMV Cl-13 challenge.** Data are based on cDNA microarray analysis of Figure 4 and ordered by fold change (2<sup>nd</sup> column). Top 50 genes are included.

**Table S2. Top genes enriched in CD4 T cells from LM-GP61 vaccination followed by LCMV Cl-13 challenge.** Data are based on cDNA microarray analysis of Figure 4 and ordered by fold change (2<sup>nd</sup> column). Top 50 genes are included.

**Table S3. Top gene sets enriched in CD4 T cells from LM-wt or LM-GP61 vaccination followed by LCMV Cl-13 challenge.** Data are based on cDNA microarray analysis of Figure 4.

# Fig S1

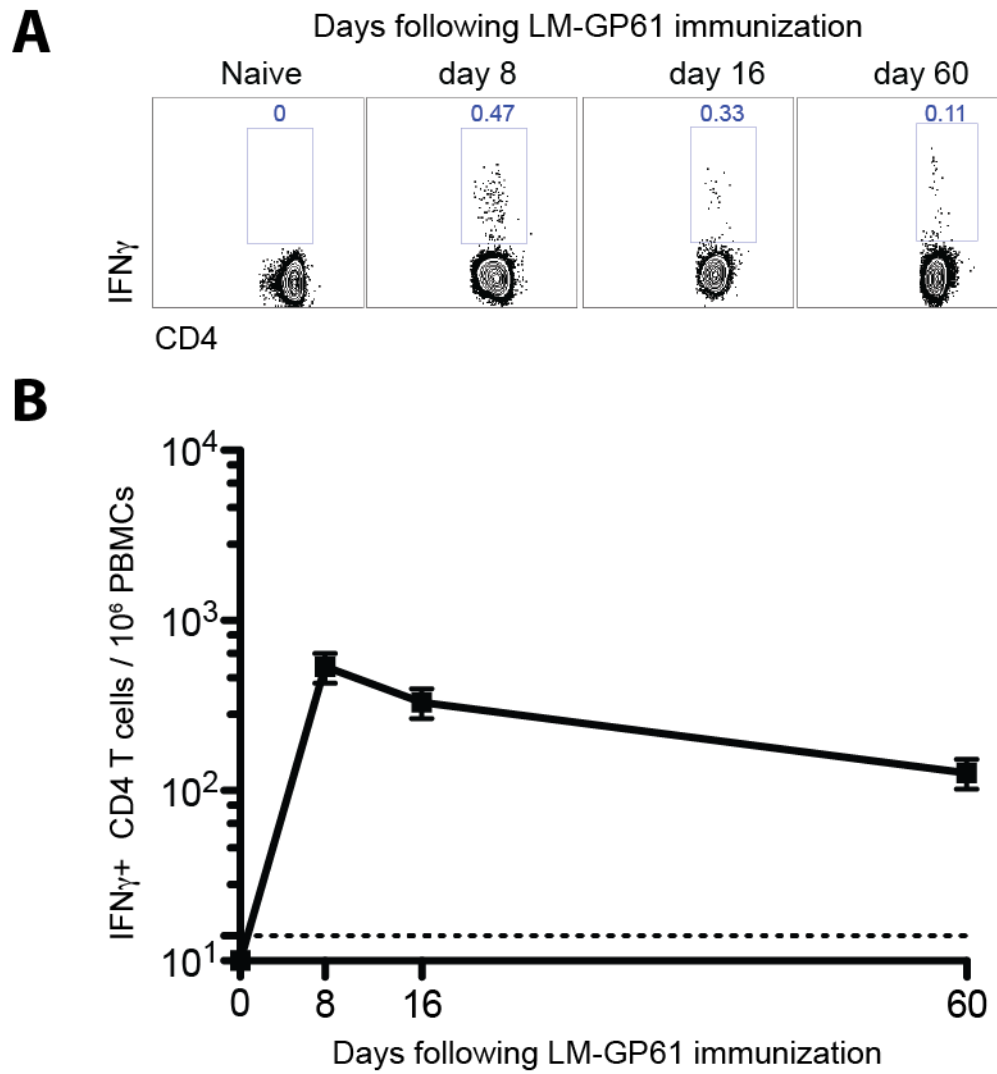

# Fig S2

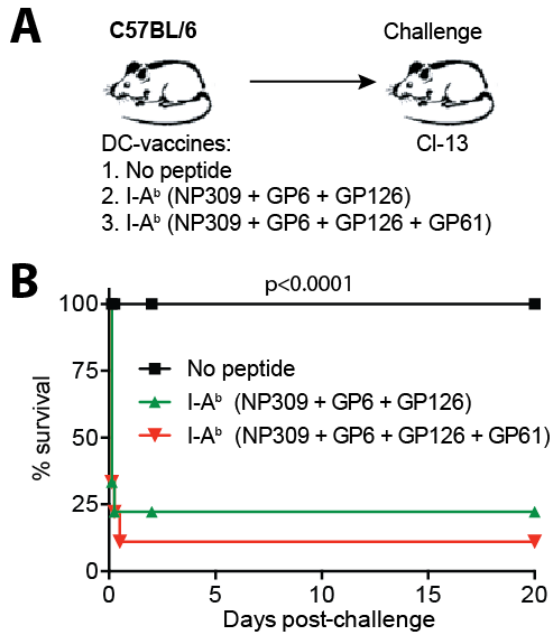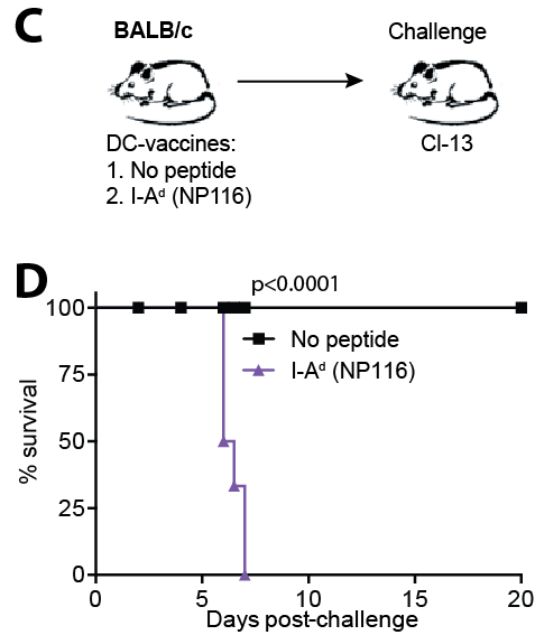

# Fig S3

**A**

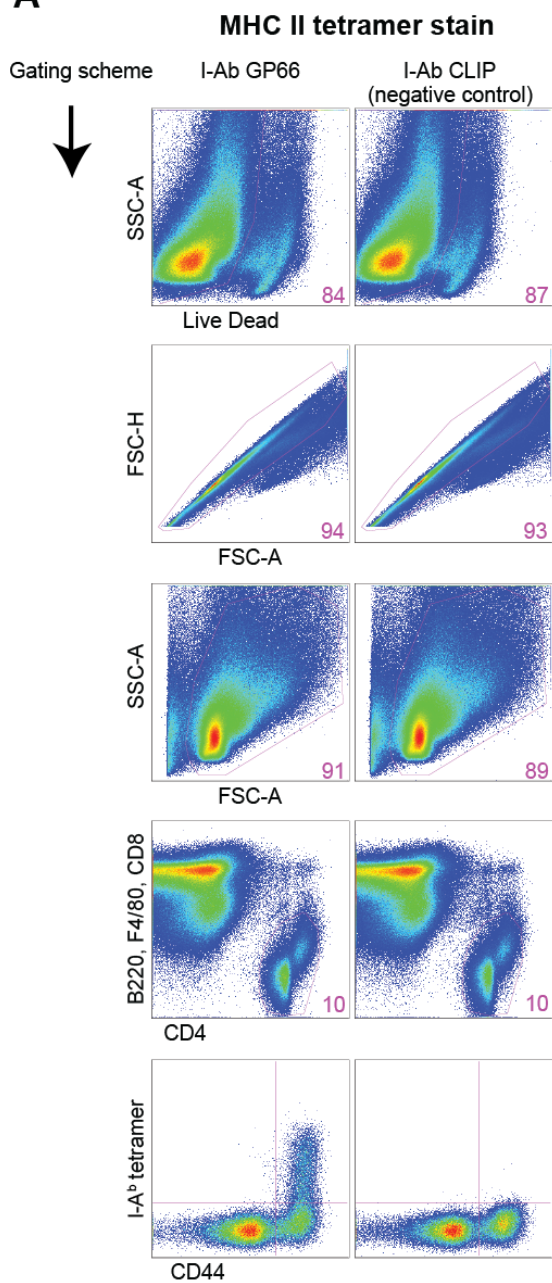

**B**

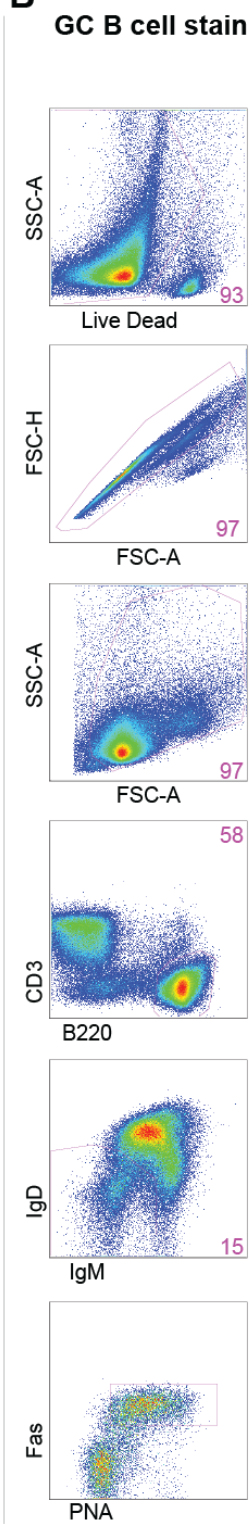

**C**

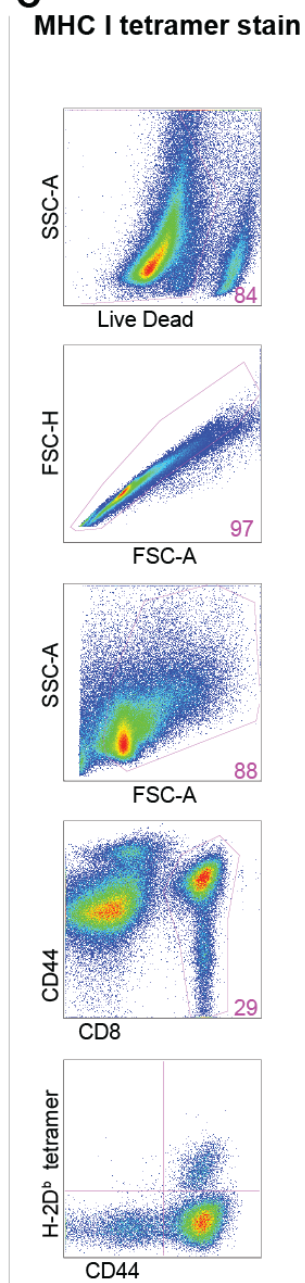

# Fig S4

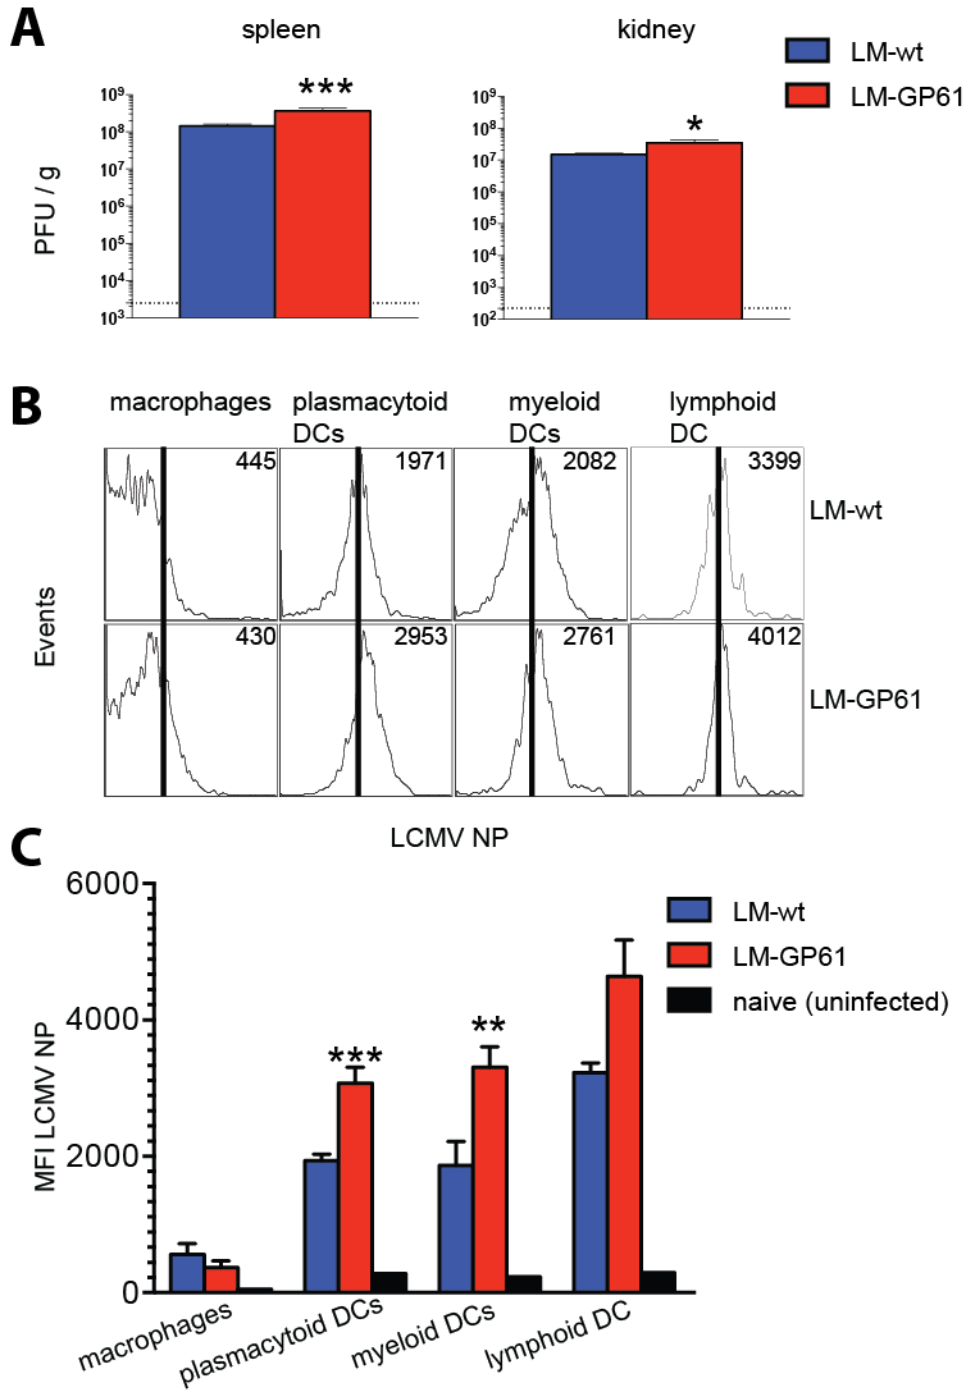



Fig S5

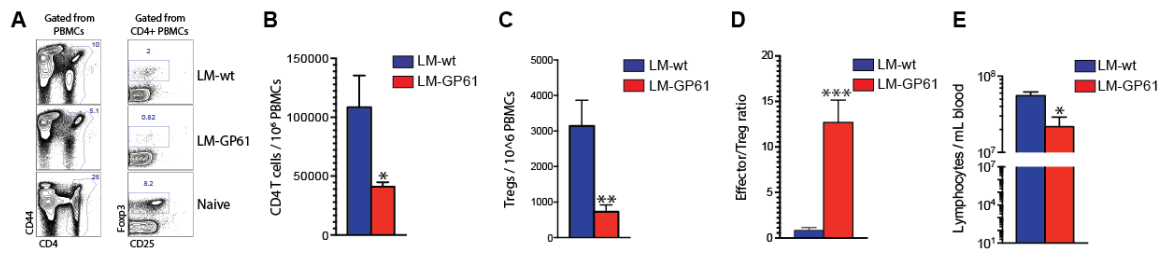

**Fig. S6**

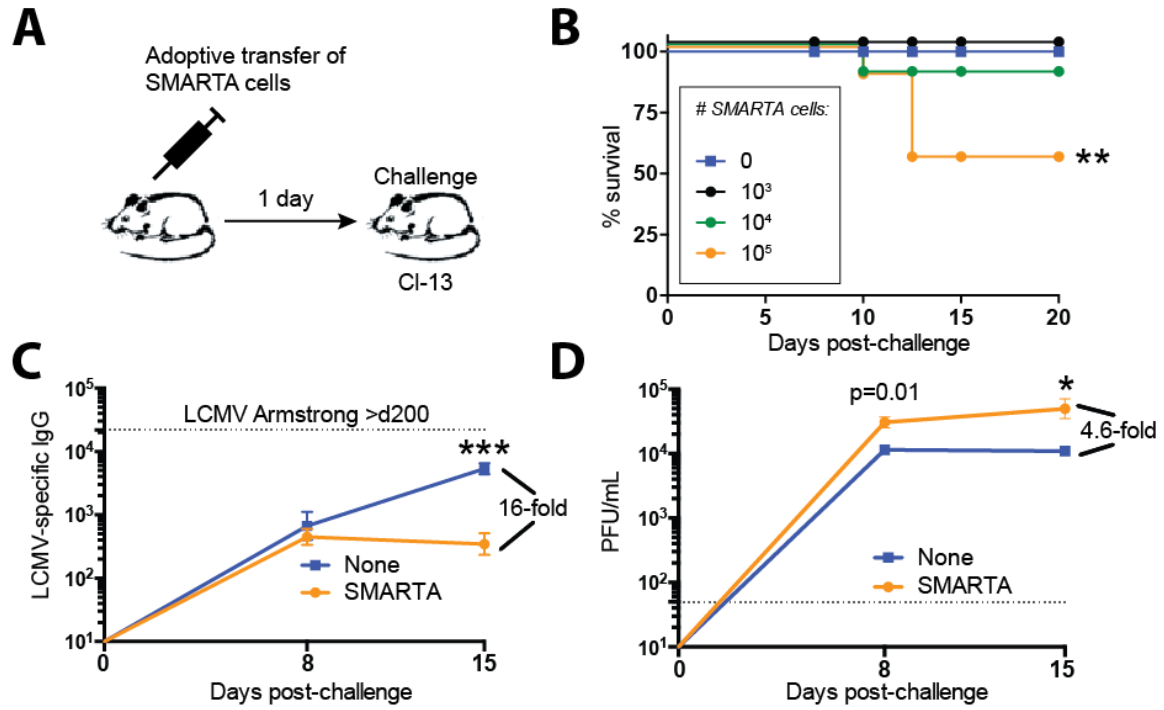

# Fig. S7

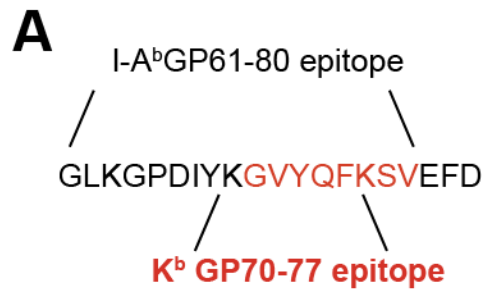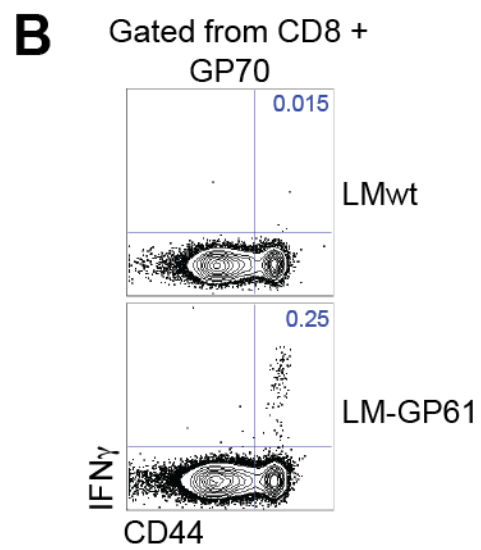

**Fig S8**

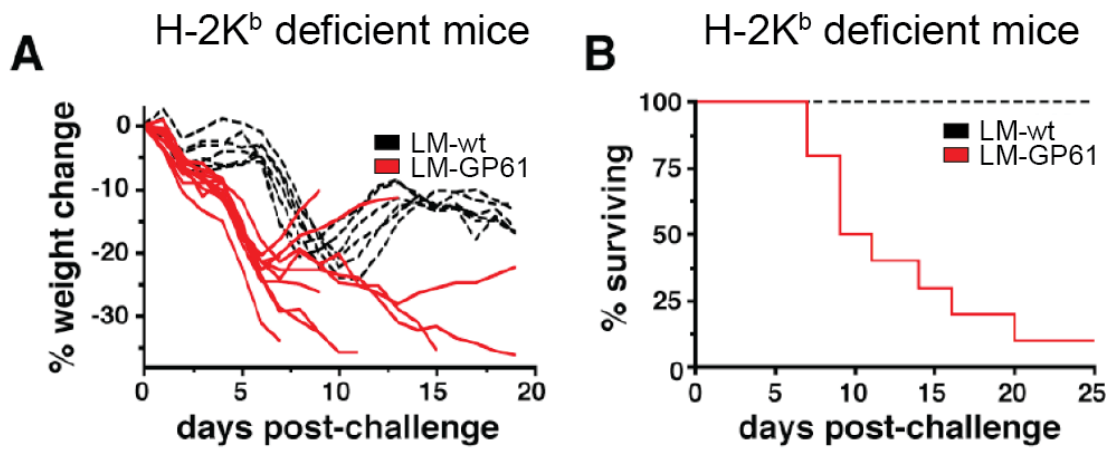

# Fig S9

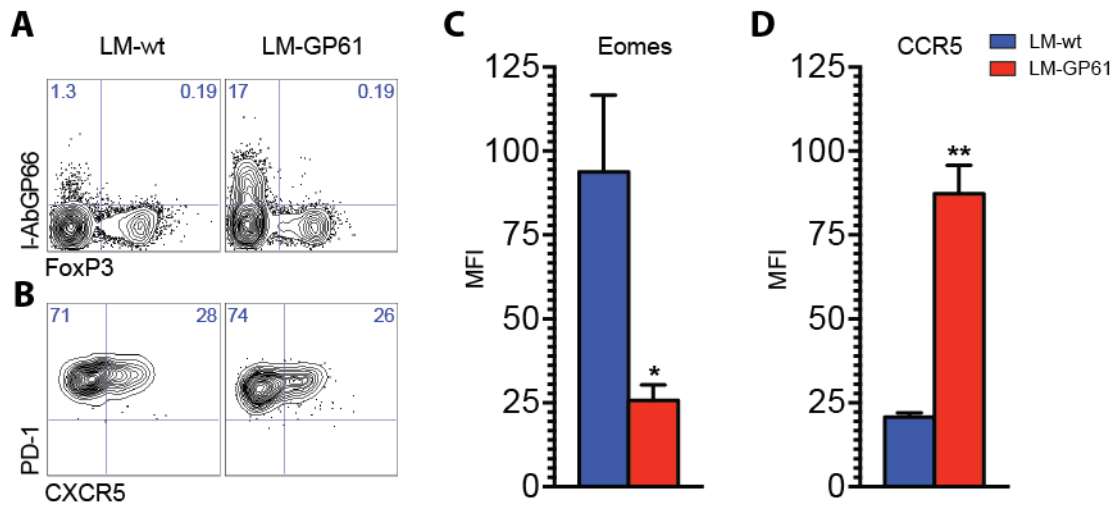

# Fig S10

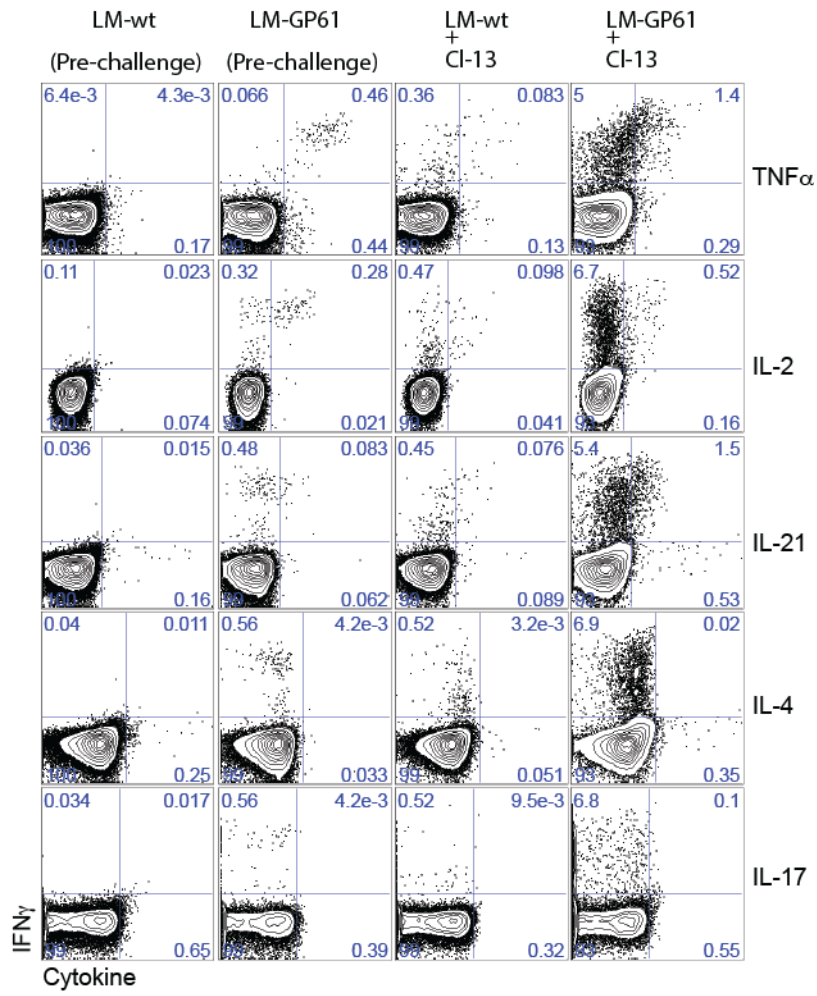

# Fig S11

## Cluster analysis using GOrilla LM-GP61 vs LM-wt

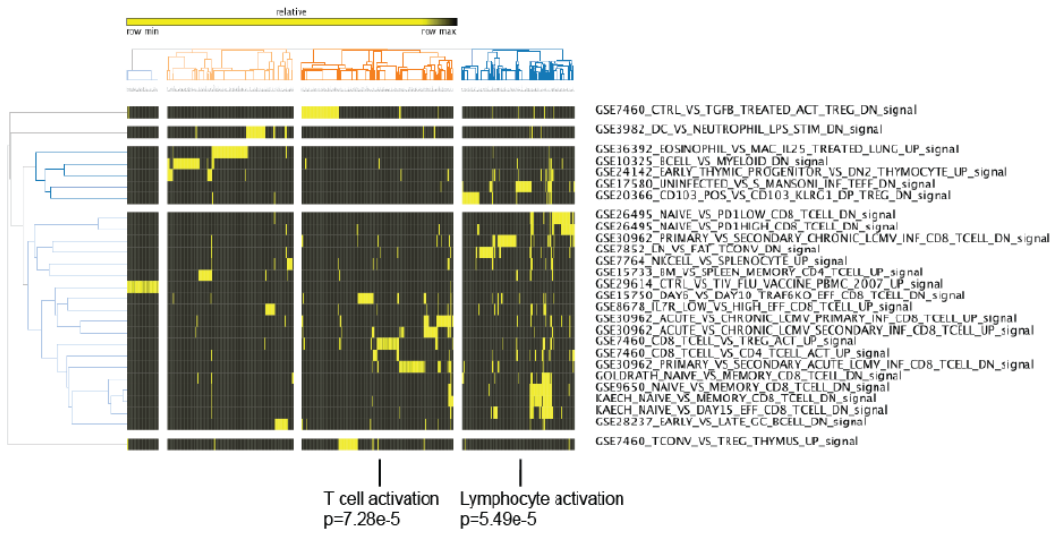

# Fig S12

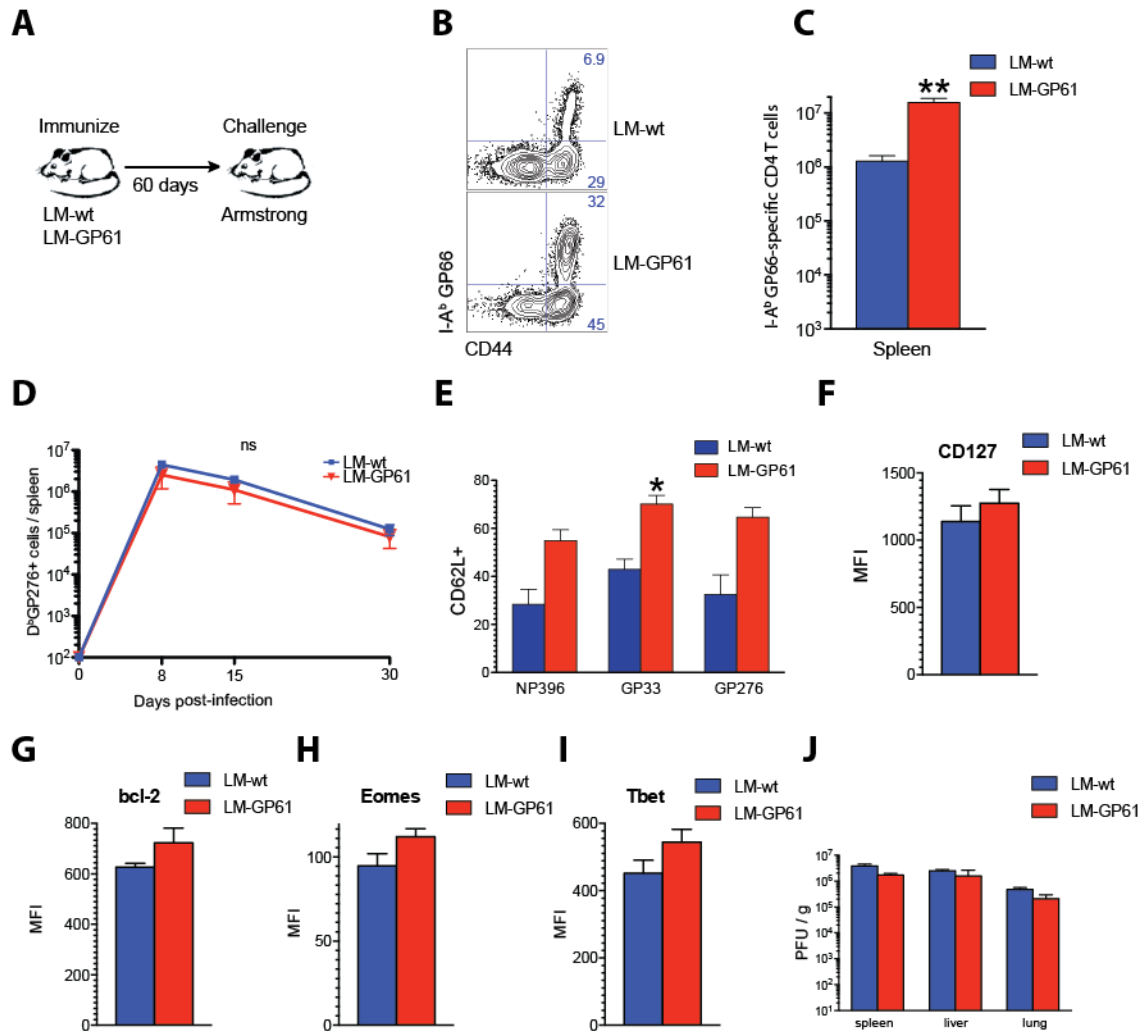



**Fig S13**

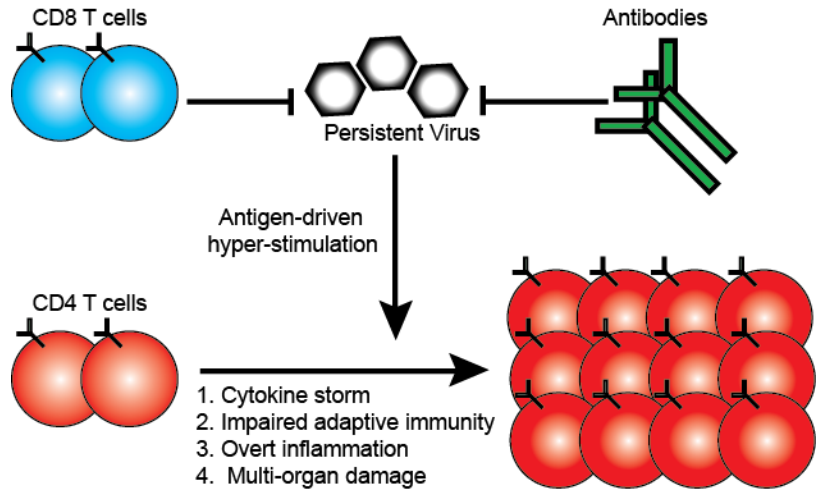

**Table S1.** Top 50 genes enriched in **LM-wt** v. **LM-GP61** based on cDNA microarray analysis and ordered by fold change (2<sup>nd</sup> column)

| <b>Gene Symbol</b> | <b>Log 2 Fold Change</b> | <b>p-value<br/>(Asymptotic T test)</b> |
|--------------------|--------------------------|----------------------------------------|
| AURKB              | 5.6593                   | 0.02787                                |
| IL22               | 5.6333                   | 0.02997                                |
| HMG3               | 5.6116                   | 0.01466                                |
| 2900062L11RIK      | 5.0725                   | 0.02516                                |
| GCG                | 4.9031                   | 0.04863                                |
| EOMES              | 4.6018                   | 0.01837                                |
| PPIL5              | 4.3516                   | 0.03335                                |
| SWAP70             | 4.2468                   | 0.02405                                |
| SUSD2              | 4.1903                   | 0.0581                                 |
| KIT                | 4.1647                   | 0.03044                                |
| ESCO2              | 4.1234                   | 0.02593                                |
| MCM10              | 4.0432                   | 0.02879                                |
| 6430514L14RIK      | 4.0289                   | 0.03922                                |
| PRR11              | 3.8208                   | 0.02608                                |
| LAD1               | 3.7912                   | 0.02273                                |
| CCNB2              | 3.7544                   | 0.02175                                |
| A930038C07RIK      | 3.7071                   | 0.388                                  |
| PADI4              | 3.682                    | 0.02705                                |
| DCTD               | 3.6525                   | 0.3023                                 |
| 1700071A11RIK      | 3.6162                   | 0.04653                                |
| SELL               | 3.5681                   | 0.02308                                |
| 2810433K01RIK      | 3.5546                   | 0.03273                                |
| 4932431H17RIK      | 3.552                    | 0.02037                                |
| CCNF               | 3.4928                   | 0.0391                                 |
| UBE2C              | 3.4709                   | 0.01996                                |
| KNTC1              | 3.3894                   | 0.02904                                |
| H2-OB              | 3.3866                   | 0.04693                                |
| NCAPG2             | 3.3855                   | 0.03003                                |
| 9230117N10RIK      | 3.3824                   | 0.03131                                |
| MPZL1              | 3.3155                   | 0.02893                                |
| DEPDC1A            | 3.3044                   | 0.0401                                 |
| LASS6              | 3.2826                   | 0.02694                                |
| CEP55              | 3.2405                   | 0.02325                                |
| PLXDC2             | 3.2279                   | 0.03017                                |
| PBK                | 3.1467                   | 0.02494                                |
| QSCN6L1            | 3.1413                   | 0.0601                                 |
| 1110004B13RIK      | 3.1409                   | 0.02644                                |
| RAD51AP1           | 3.1384                   | 0.03054                                |
| MAN1C1             | 3.137                    | 0.02485                                |
| E2F7               | 3.0862                   | 0.03713                                |
| CDCA1              | 3.0671                   | 0.0391                                 |
| PRKRA              | 3.0666                   | 0.5928                                 |
| ADSSL1             | 3.0382                   | 0.0407                                 |
| TPX2               | 3.0305                   | 0.03622                                |
| BIRC5              | 3.0137                   | 0.02475                                |
| PPIC               | 3.0051                   | 0.01875                                |
| KIF15              | 3.0034                   | 0.03028                                |
| RAD51              | 3.0001                   | 0.02803                                |
| NOC3L              | 2.9973                   | 0.05796                                |
| SESTD1             | 2.9905                   | 0.02933                                |

**Table S2.** Top 50 genes enriched in **LM-GP61** v. **LM-wt** based on cDNA microarray analysis and ordered by fold change (2<sup>nd</sup> column)

| <b>Gene Symbol</b> | <b>Log 2 Fold Change</b> | <b>p-value<br/>(Asymptotic T test)</b> |
|--------------------|--------------------------|----------------------------------------|
| KLRK1              | 9.2136                   | 0.06493                                |
| SERPINA3G          | 6.2471                   | 0.06544                                |
| KLRG1              | 4.9179                   | 0.04649                                |
| BC005685           | 4.6354                   | 0.05566                                |
| AA467197           | 4.384                    | 0.03992                                |
| ARL4C              | 4.3164                   | 0.04052                                |
| KCNJ8              | 4.3062                   | 0.07663                                |
| KLRB1D             | 4.0819                   | 0.06764                                |
| 6230424C14RIK      | 4.0322                   | 0.08232                                |
| SSBP2              | 3.8675                   | 0.07541                                |
| ITGA1              | 3.8024                   | 0.06788                                |
| CCR5               | 3.6658                   | 0.04267                                |
| IGHG               | 3.5295                   | 0.07094                                |
| IGK-V21-12         | 3.4954                   | 0.05085                                |
| CTLA2B             | 3.3735                   | 0.03877                                |
| CTLA2A             | 3.3436                   | 0.03856                                |
| 8430420C20RIK      | 3.2985                   | 0.06516                                |
| LOC552908          | 3.2666                   | 0.09544                                |
| A230057G18RIK      | 3.2424                   | 0.04357                                |
| CLEC2G             | 3.1842                   | 0.08974                                |
| EPHA3              | 3.1794                   | 0.09531                                |
| CTLA2A             | 3.1736                   | 0.03439                                |
| 6720427H10RIK      | 3.1134                   | 0.04914                                |
| RASD2              | 3.1107                   | 0.06215                                |
| GZMF               | 3.0713                   | 0.05845                                |
| 9030208C03RIK      | 3.0441                   | 0.03881                                |
| YES1               | 3.0327                   | 0.06449                                |
| AW146020           | 3.0113                   | 0.04268                                |
| DSP                | 2.9541                   | 0.0756                                 |
| CSF1               | 2.9266                   | 0.05058                                |
| C030002C11RIK      | 2.8996                   | 0.05656                                |
| 1700012B18RIK      | 2.8813                   | 0.0506                                 |
| 2610035D17RIK      | 2.876                    | 0.06514                                |
| LOC641050          | 2.8533                   | 0.04783                                |
| TMIE               | 2.8468                   | 0.07089                                |
| 2610507N02RIK      | 2.8183                   | 0.05439                                |
| RGS1               | 2.8158                   | 0.03293                                |
| LRRK1              | 2.8038                   | 0.05277                                |
| KLRB1B             | 2.7946                   | 0.04274                                |
| E230029C05RIK      | 2.7414                   | 0.1057                                 |
| CSPRS              | 2.739                    | 0.04617                                |
| FGL2               | 2.6891                   | 0.08082                                |
| AGRIN              | 2.6849                   | 0.03109                                |
| TUBB4              | 2.6816                   | 0.05345                                |
| AI120166           | 2.6263                   | 0.078                                  |
| 2210408F21RIK      | 2.5989                   | 0.06247                                |
| ADRB1              | 2.5723                   | 0.06929                                |
| D12ERTD553E        | 2.5649                   | 0.04997                                |
| KCTD12             | 2.5633                   | 0.05962                                |
| C130090I23RIK      | 2.5588                   | 0.08806                                |

**Table S3. Top gene sets enriched in CD4 T cells from LM-wt or LM-GP61 vaccination followed by LCMV CI-13 challenge.** Data are based on cDNA microarray analysis of Figure 4.

| <b>C7 gene set enriched in LM-GP61 v. LM-wt</b>             |            |                |
|-------------------------------------------------------------|------------|----------------|
| <b>NAME</b>                                                 | <b>NES</b> | <b>P value</b> |
| GSE30962_PRIMARY_VS_SECONDARY_CHRONIC_LCMV_INF_CD8_TCELL_DN | -2.4689    | 0.0000         |
| GSE30962_PRIMARY_VS_SECONDARY_ACUTE_LCMV_INF_CD8_TCELL_DN   | -2.2381    | 0.0000         |
| GSE30962_ACUTE_VS_CHRONIC_LCMV_PRIMARY_INF_CD8_TCELL_UP     | -2.0530    | 0.0000         |
| GSE15750_DAY6_VS_DAY10_TRAF6KO_EFF_CD8_TCELL_DN             | -2.0507    | 0.0000         |
| GSE9650_NAIVE_VS_MEMORY_CD8_TCELL_DN                        | -1.7805    | 0.0000         |
| GOLDRATH_NAIVE_VS_MEMORY_CD8_TCELL_DN                       | -1.7564    | 0.0000         |
| KAECH_NAIVE_VS_MEMORY_CD8_TCELL_DN                          | -1.7500    | 0.0000         |
| GSE7460_CD8_TCELL_VS_TREG_ACT_UP                            | -1.7491    | 0.0000         |
| GSE7852_LN_VS_FAT_TCONV_DN                                  | -1.7366    | 0.0000         |
| GSE7460_CD8_TCELL_VS_CD4_TCELL_ACT_UP                       | -1.6817    | 0.0000         |
| GSE29614_CTRL_VS_TIV_FLU_VACCINE_PBMC_2007_UP               | -1.6772    | 0.0000         |
| GSE10325_BCELL_VS_MYELOID_DN                                | -1.6592    | 0.0000         |
| GSE26495_NAIVE_VS_PD1LOW_CD8_TCELL_DN                       | -1.6065    | 0.0024         |
| GSE30962_ACUTE_VS_CHRONIC_LCMV_SECONDARY_INF_CD8_TCELL_UP   | -1.5835    | 0.0045         |
| GSE24142_EARLY_THYMIC_PROGENITOR_VS_DN2_THYMOCYTE_UP        | -1.5702    | 0.0000         |
| GSE17580_UNINFECTED_VS_S_MANSONI_INF_TEFF_DN                | -1.5669    | 0.0000         |
| GSE7764_NKCELL_VS_SPLENOCYTE_UP                             | -1.5227    | 0.0000         |
| GSE8678_IL7R_LOW_VS_HIGH_EFF_CD8_TCELL_UP                   | -1.5163    | 0.0022         |
| GSE26495_NAIVE_VS_PD1HIGH_CD8_TCELL_DN                      | -1.5161    | 0.0000         |
| KAECH_NAIVE_VS_DAY15_EFF_CD8_TCELL_DN                       | -1.5095    | 0.0024         |
| GSE15733_BM_VS_SPLEEN_MEMORY_CD4_TCELL_UP                   | -1.4996    | 0.0048         |
| GSE3982_DC_VS_NEUTROPHIL_LPS_STIM_DN                        | -1.4949    | 0.0042         |
| GSE7460_CTRL_VS_TGFB_TREATED_ACT_TREG_DN                    | -1.4914    | 0.0048         |
| GSE36392_EOSINOPHIL_VS_MAC_IL25_TREATED_LUNG_UP             | -1.4913    | 0.0071         |
| GSE20366_CD103_POS_VS_CD103_KLRG1_DP_TREG_DN                | -1.4891    | 0.0046         |
| GSE28237_EARLY_VS_LATE_GC_BCELL_DN                          | -1.4430    | 0.0049         |
| GSE7460_TCONV_VS_TREG_THYMUS_UP                             | -1.4099    | 0.0092         |
